# Supplementary material for: Optimizing the performance of photocatalytic H2 generation for ZnNb2O6 synthesized by a two-step hydrothermal method
Source: Royal Society of Chemistry journal article supplement (doi:10.1039/c8ra01624k), 2018-01-01
Supplement: c8ra01624k1.pdf [file c8ra01624k1.pdf]

Electronic Supplementary Information for

Optimizing the performance of photocatalytic H<sub>2</sub> generation for  
ZnNb<sub>2</sub>O<sub>6</sub> synthesized by a two-step hydrothermal method

*Yutong Chun,<sup>a</sup> Mufei Yue<sup>a</sup> Pengfei Jiang,<sup>ab\*</sup> Shijian Chen,<sup>b</sup> Wenliang Gao,<sup>a</sup> Rihong Cong,<sup>a</sup>*

*Tao Yang<sup>a\*</sup>*

<sup>a</sup> College of Chemistry and Chemical Engineering, Chongqing University, Chongqing  
401331, P. R. China

<sup>b</sup> College of Physics, Chongqing University, Chongqing 401331, P. R. China

\*Corresponding authors, e-mails: pengfeijiang@cqu.edu.cn; taoyang@cqu.edu.cn.

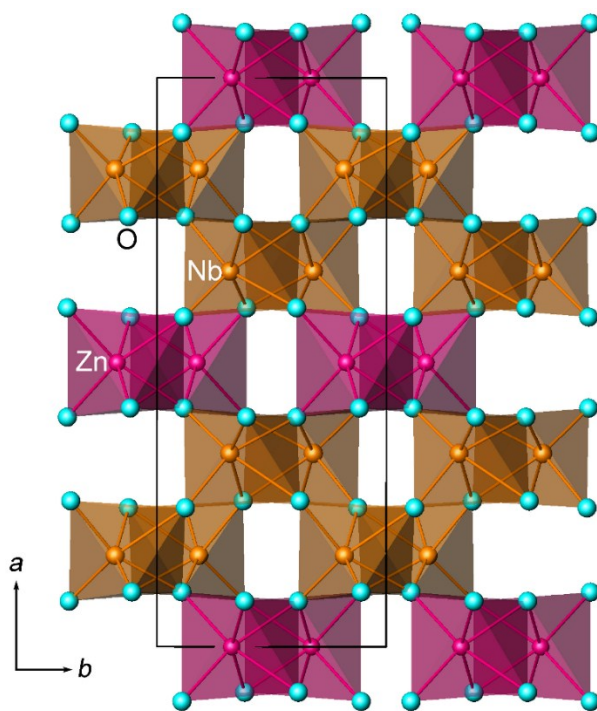

Figure S1 Structure view of ZnNb<sub>2</sub>O<sub>6</sub> along the *c*-axis.

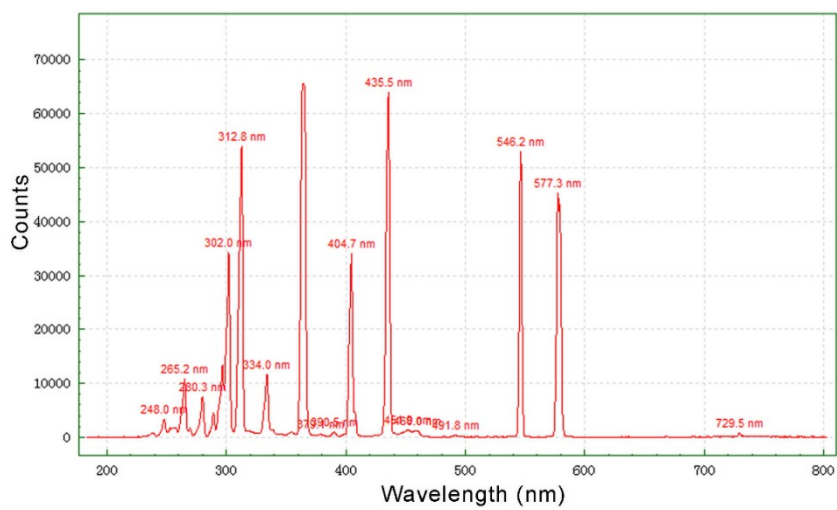

Figure S2 Emission spectrum from the Hg-lamp used in our study.

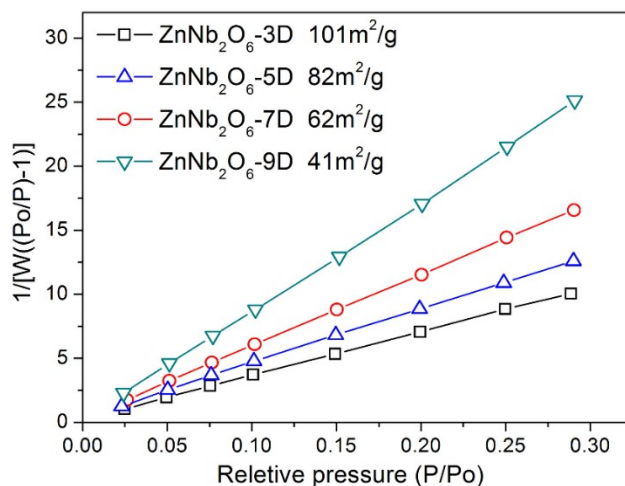

Figure S3 Specific surface areas for ZnNb<sub>2</sub>O<sub>6</sub>-3D, -5D, -7D, and -9D estimated according to the BET method.

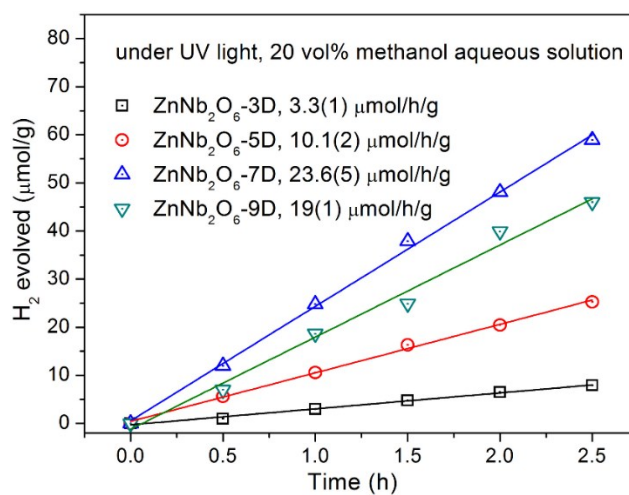

Figure S4 Time-dependent photocatalytic H<sub>2</sub> generation data for as-synthesized ZnNb<sub>2</sub>O<sub>6</sub> samples.

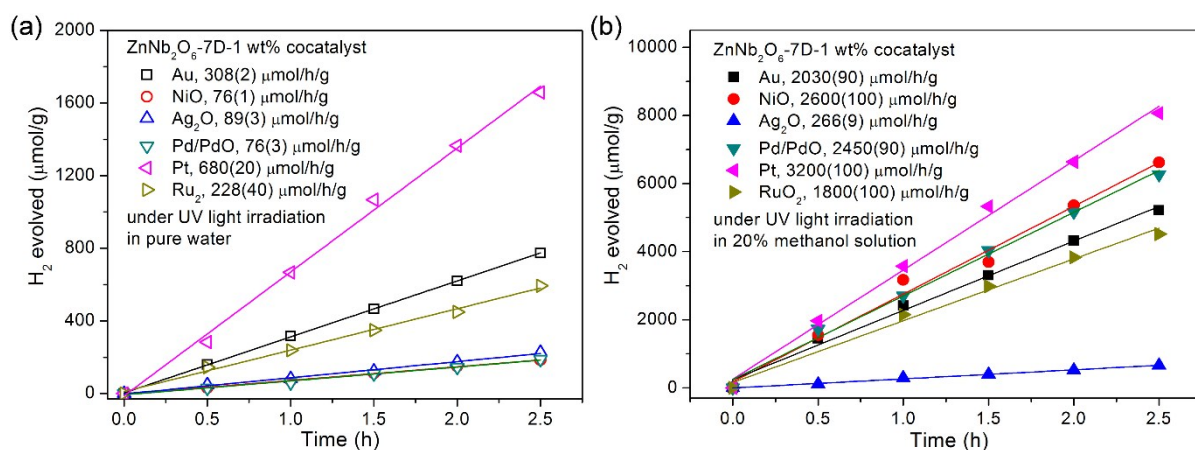

Figure S5 Time-dependent photocatalytic H<sub>2</sub> generation data for ZnNb<sub>2</sub>O<sub>6</sub>-loaded with 1 wt% cocatalyst in (a) water and (b) 20 vol% methanol aqueous solution.

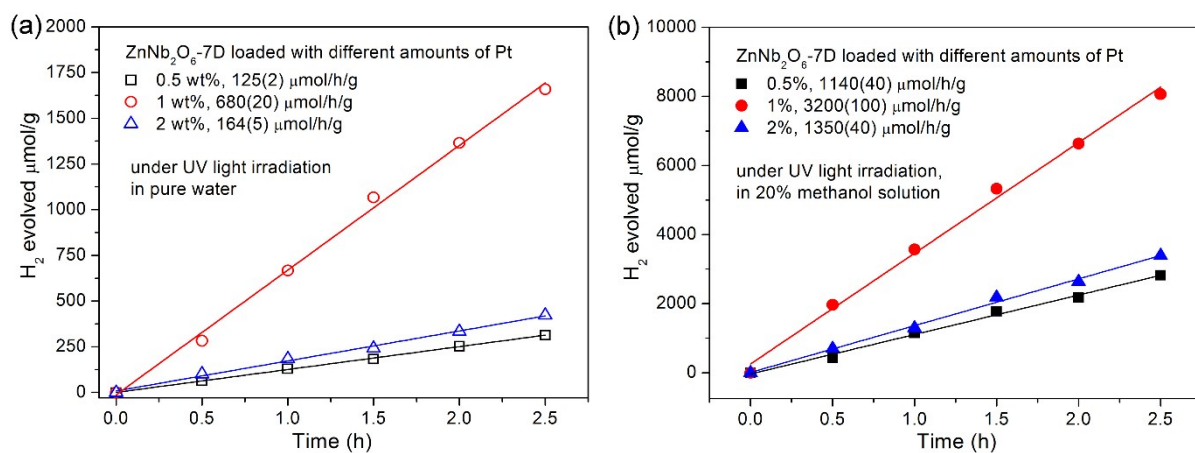

Figure S6 Photocatalytic H<sub>2</sub> evolution curves of ZnNb<sub>2</sub>O<sub>6</sub>-7D loaded with different amounts of Pt in (a) water and (b) 20 vol% methanol solution.
